# Supplementary material
Source: PubMed Central journal article supplement (PMC7526823)
Supplement: AAC.00573-20-s0001.pdf [file AAC.00573-20-s0001.pdf]

Figure S1. *mcr-9* plasmid in isolate 28945. Antimicrobial resistance genes are labeled in red, with additional genes labeled if related to metal resistance, insertion sequences, or plasmid maintenance/transfer.

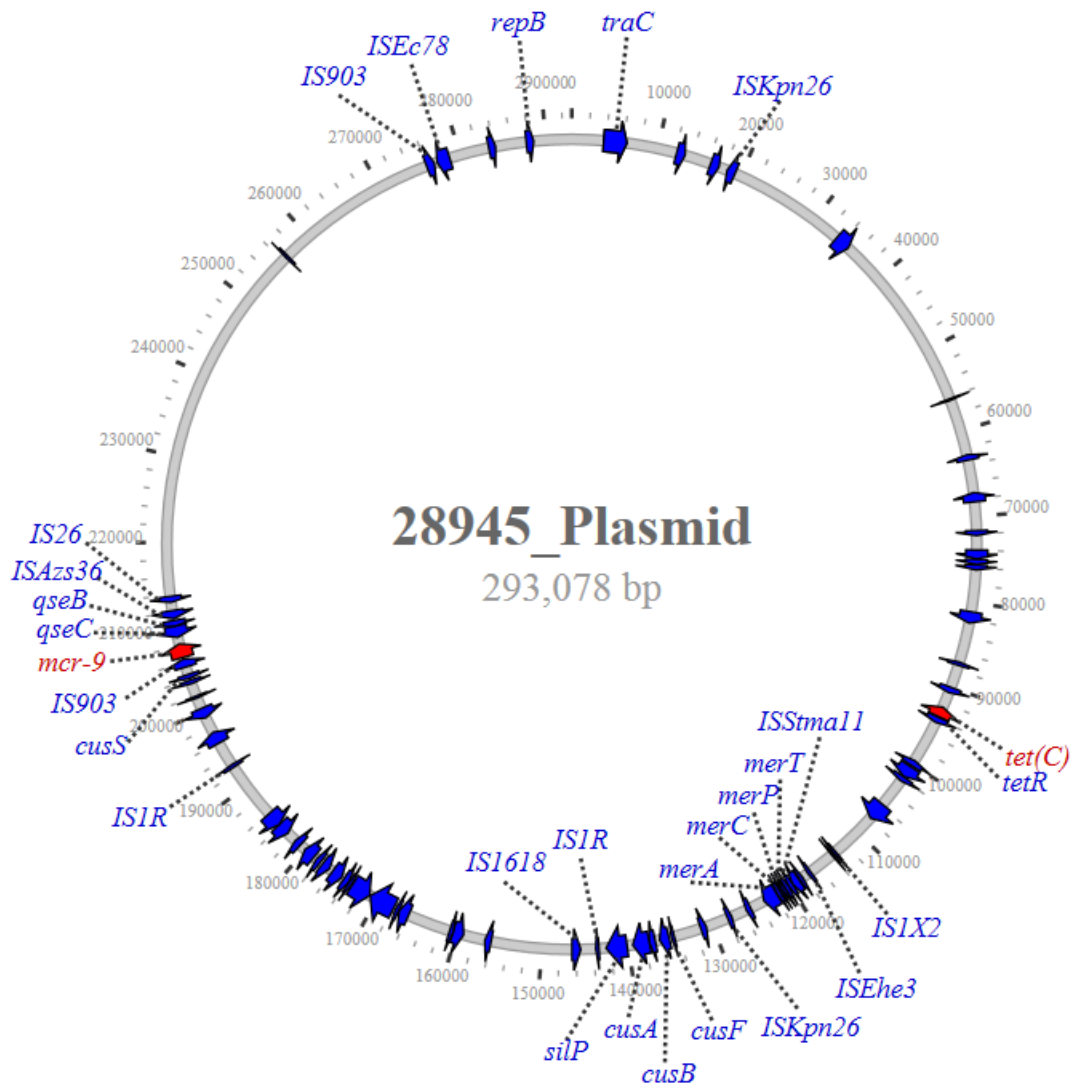

Figure S2. Multidrug-resistance *mcr-9* plasmid in N18EC0432. Antimicrobial resistance genes are labeled in red, with additional genes labeled if related to metal resistance, insertion sequences, or plasmid maintenance/transfer.

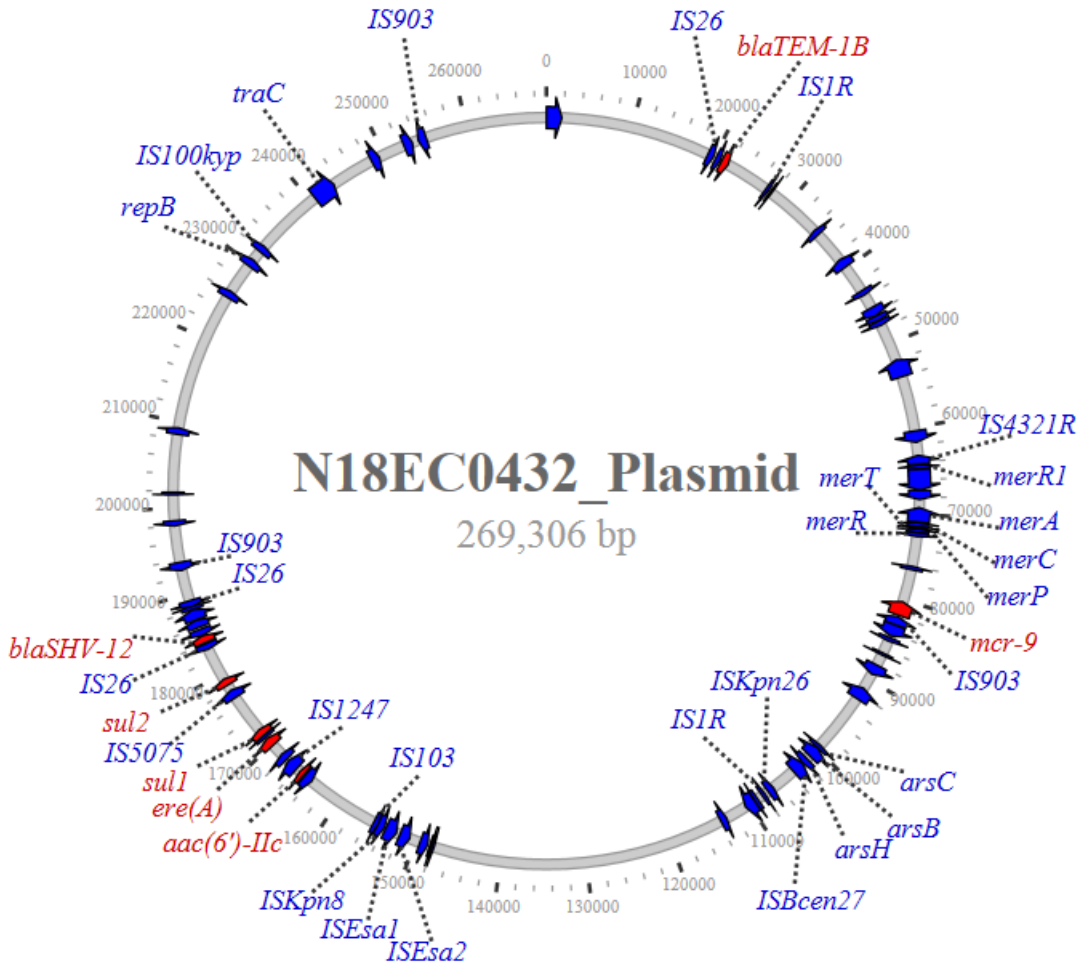

Figure S3. Multidrug-resistance *mcr-9* plasmid in N53023. Antimicrobial resistance genes are labeled in red, with additional genes labeled if related to metal resistance, insertion sequences, or plasmid maintenance/transfer.

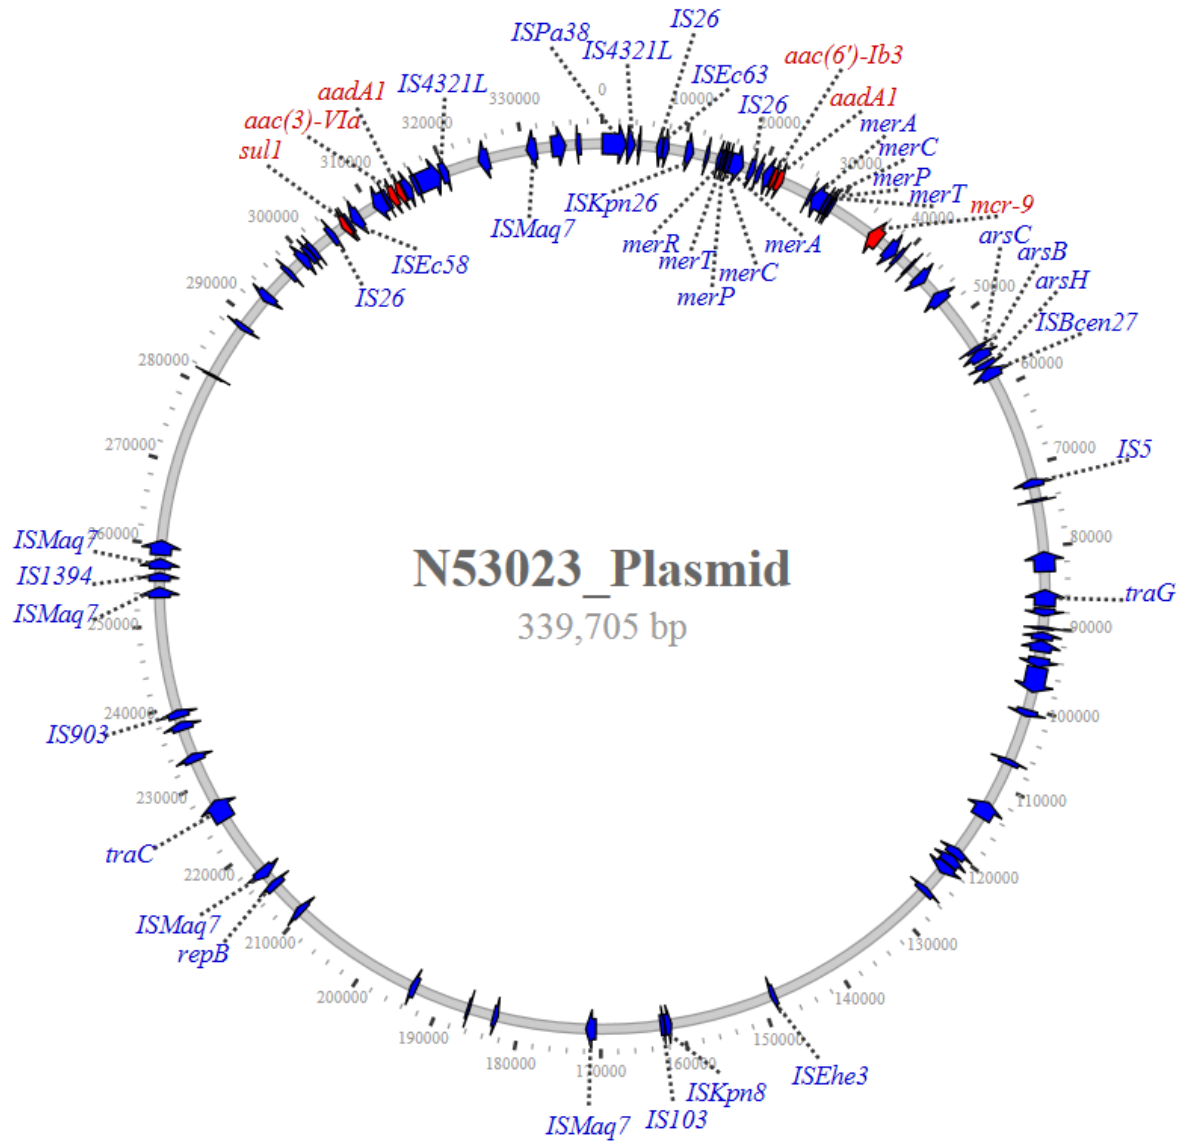

**Table S1. Isolate-level susceptibility data and metadata**

| Isolate ID | Organism           | Serotype       | State | Collection Year | Isolation Source | NCBI accession | COL     | POL   | qseBC |
|------------|--------------------|----------------|-------|-----------------|------------------|----------------|---------|-------|-------|
| CVM 22018  | <i>S. enterica</i> | Saintpaul      | OR    | 2002            | Ground Turkey    | SRR1200761     | <= 0.25 | = 0.5 |       |
| CVM 22149  | <i>S. enterica</i> | Saintpaul      | GA    | 2002            | Ground Turkey    | SRR1200748     | <= 0.25 | = 0.5 |       |
| CVM 28945  | <i>S. enterica</i> | Schwarzengrund | MN    | 2003            | Ground Turkey    | SRR1272497     | = 0.5   | = 1   | qseBC |
| CVM 29191  | <i>S. enterica</i> | Saintpaul      | GA    | 2003            | Ground Turkey    | SRR1299269     | <= 0.25 | = 0.5 |       |
| CVM 29197  | <i>S. enterica</i> | Schwarzengrund | GA    | 2003            | Ground Turkey    | SRR1300672     | = 0.5   | = 0.5 | qseBC |
| N129       | <i>S. enterica</i> | Saintpaul      | CO    | 2004            | Ground Turkey    | SRR1793249     | <= 0.25 | = 0.5 |       |
| N132       | <i>S. enterica</i> | Saintpaul      | CO    | 2004            | Ground Turkey    | SRR1805680     | <= 0.25 | = 0.5 |       |
| N153       | <i>S. enterica</i> | Schwarzengrund | CT    | 2004            | Ground Turkey    | SRR1813455     | = 0.5   | = 1   | qseBC |
| N505       | <i>S. enterica</i> | Schwarzengrund | NY    | 2004            | Ground Turkey    | SRR949384      | = 0.5   | = 0.5 | qseBC |
| N1566      | <i>S. enterica</i> | Schwarzengrund | MD    | 2004            | Ground Turkey    | SRR1562599     | <= 0.25 | = 1   | qseBC |
| N4500      | <i>S. enterica</i> | Saintpaul      | CO    | 2005            | Ground Turkey    | SRR1805588     | <= 0.25 | = 0.5 |       |
| N4633      | <i>S. enterica</i> | Saintpaul      | GA    | 2005            | Ground Turkey    | SRR3224092     | <= 0.25 | = 0.5 |       |
| N1532      | <i>S. enterica</i> | Schwarzengrund | GA    | 2005            | Ground Turkey    | SRR1553749     | = 0.5   | = 0.5 | qseBC |
| N9133      | <i>S. enterica</i> | Saintpaul      | CO    | 2006            | Ground Turkey    | SRR1801550     | <= 0.25 | = 1   |       |
| N9162      | <i>S. enterica</i> | Saintpaul      | CT    | 2006            | Ground Turkey    | SRR1823688     | = 0.5   | = 0.5 |       |
| N13112     | <i>S. enterica</i> | Saintpaul      | CO    | 2007            | Ground Turkey    | SRR1946971     | <= 0.25 | = 0.5 |       |
| N13136     | <i>S. enterica</i> | Saintpaul      | NM    | 2007            | Ground Turkey    | SRR1951844     | = 0.5   | = 0.5 |       |
| N14334     | <i>S. enterica</i> | Saintpaul      | TN    | 2007            | Pork Chop        | SRR2071081     | = 0.5   | = 0.5 |       |
| N16446     | <i>S. enterica</i> | Saintpaul      | TN    | 2008            | Ground Turkey    | SRR2669160     | <= 0.25 | = 0.5 |       |
| N18397     | <i>S. enterica</i> | Saintpaul      | GA    | 2008            | Ground Turkey    | SRR2982346     | = 0.5   | = 0.5 |       |
| N20013     | <i>S. enterica</i> | Saintpaul      | CO    | 2009            | Ground Turkey    | SRR3111274     | = 0.5   | = 0.5 |       |
| N20062     | <i>S. enterica</i> | Mbandaka       | CT    | 2009            | Chicken Breast   | SRR3115191     | = 0.5   | = 0.5 |       |
| N23563     | <i>S. enterica</i> | Senftenberg    | NY    | 2009            | Chicken Breast   | SRR3740201     | <= 0.25 | = 0.5 |       |
| N23649     | <i>S. enterica</i> | Saintpaul      | SC    | 2009            | Ground Beef      | SRR3184156     | <= 0.25 | = 0.5 |       |
| N23663     | <i>S. enterica</i> | Saintpaul      | TN    | 2009            | Ground Beef      | SRR3184161     | <= 0.25 | = 0.5 |       |
| N23664     | <i>S. enterica</i> | Saintpaul      | TN    | 2009            | Ground Beef      | SRR3184167     | <= 0.25 | = 0.5 |       |
| N23725     | <i>S. enterica</i> | Saintpaul      | GA    | 2010            | Ground Turkey    | SRR3098666     | <= 0.25 | = 0.5 |       |
| N23767     | <i>S. enterica</i> | Saintpaul      | MN    | 2010            | Ground Turkey    | SRR3098649     | = 0.5   | = 2   |       |

|        |                    |                |    |      |                |            |         |         |  |
|--------|--------------------|----------------|----|------|----------------|------------|---------|---------|--|
| N29340 | <i>S. enterica</i> | Saintpaul      | MN | 2011 | Ground Turkey  | SRR3665001 | <= 0.25 | = 1     |  |
| N29348 | <i>S. enterica</i> | Heidelberg     | PA | 2011 | Ground Turkey  | SRR3665009 | <= 0.25 | = 0.5   |  |
| N29361 | <i>S. enterica</i> | Saintpaul      | CO | 2011 | Ground Turkey  | SRR3665022 | = 1     | = 0.5   |  |
| N29367 | <i>S. enterica</i> | Litchfield     | NM | 2011 | Chicken Breast | SRR1840618 | <= 0.25 | = 0.5   |  |
| N29374 | <i>S. enterica</i> | Saintpaul      | NM | 2011 | Ground Turkey  | SRR3665034 | <= 0.25 | = 0.5   |  |
| N29376 | <i>S. enterica</i> | Saintpaul      | NM | 2011 | Ground Turkey  | SRR3665036 | <= 0.25 | = 0.5   |  |
| N30638 | <i>S. enterica</i> | Saintpaul      | CT | 2011 | Ground Turkey  | SRR3665047 | <= 0.25 | = 0.5   |  |
| N30653 | <i>S. enterica</i> | Saintpaul      | GA | 2011 | Ground Turkey  | SRR3665062 | = 0.5   | = 1     |  |
| N30654 | <i>S. enterica</i> | Saintpaul      | GA | 2011 | Ground Turkey  | SRR3665063 | <= 0.25 | = 0.5   |  |
| N30697 | <i>S. enterica</i> | Saintpaul      | NY | 2011 | Ground Turkey  | SRR3665106 | <= 0.25 | <= 0.25 |  |
| N30698 | <i>S. enterica</i> | Saintpaul      | NY | 2011 | Ground Turkey  | SRR3665107 | <= 0.25 | = 0.5   |  |
| N30699 | <i>S. enterica</i> | Saintpaul      | NY | 2011 | Ground Turkey  | SRR3665108 | <= 0.25 | = 0.5   |  |
| N31831 | <i>S. enterica</i> | Saintpaul      | CO | 2011 | Ground Turkey  | SRR3665159 | <= 0.25 | = 1     |  |
| N31832 | <i>S. enterica</i> | Saintpaul      | CO | 2011 | Ground Turkey  | SRR3665160 | = 0.5   | = 0.5   |  |
| N31836 | <i>S. enterica</i> | Saintpaul      | CO | 2011 | Ground Turkey  | SRR3665164 | = 0.5   | = 0.5   |  |
| N31838 | <i>S. enterica</i> | Saintpaul      | CO | 2011 | Ground Turkey  | SRR3665166 | = 0.5   | = 0.5   |  |
| N31845 | <i>S. enterica</i> | Saintpaul      | MD | 2011 | Ground Turkey  | SRR3665172 | <= 0.25 | = 0.5   |  |
| N32764 | <i>S. enterica</i> | Kentucky       | NM | 2011 | Chicken Breast | SRR3665218 | <= 0.25 | = 0.5   |  |
| N37906 | <i>S. enterica</i> | Saintpaul      | CO | 2011 | Ground Turkey  | SRR3665259 | <= 0.25 | = 1     |  |
| N38936 | <i>S. enterica</i> | Saintpaul      | NY | 2012 | Ground Turkey  | SRR3664693 | <= 0.25 | = 0.5   |  |
| N40385 | <i>S. enterica</i> | Saintpaul      | MD | 2012 | Ground Turkey  | SRR3664742 | <= 0.25 | = 0.5   |  |
| N40391 | <i>S. enterica</i> | Saintpaul      | NM | 2012 | Ground Turkey  | SRR3664748 | = 1     | = 1     |  |
| N41750 | <i>S. enterica</i> | Schwarzengrund | NY | 2012 | Ground Turkey  | SRR3664819 | = 0.5   | = 1     |  |
| N42475 | <i>S. enterica</i> | Saintpaul      | LA | 2012 | Ground Turkey  | SRR3664907 | = 0.5   | = 0.5   |  |
| N42481 | <i>S. enterica</i> | Saintpaul      | MO | 2012 | Ground Turkey  | SRR3664913 | <= 0.25 | = 0.5   |  |
| N42519 | <i>S. enterica</i> | Saintpaul      | MD | 2012 | Ground Turkey  | SRR3664950 | = 1     | = 1     |  |
| N43456 | <i>S. enterica</i> | Saintpaul      | CO | 2013 | Ground Turkey  | SRR2566867 | = 0.5   | = 0.5   |  |
| N43461 | <i>S. enterica</i> | Saintpaul      | LA | 2013 | Ground Turkey  | SRR2566872 | <= 0.25 | = 0.5   |  |
| N45394 | <i>S. enterica</i> | Saintpaul      | LA | 2013 | Ground Turkey  | SRR2566941 | = 0.5   | = 0.5   |  |
| N45926 | <i>S. enterica</i> | Saintpaul      | CT | 2013 | Ground Turkey  | SRR2566962 | <= 0.25 | = 0.5   |  |
| N45953 | <i>S. enterica</i> | Saintpaul      | NM | 2013 | Ground Turkey  | SRR2566986 | <= 0.25 | = 0.5   |  |

|         |                    |              |    |      |                |            |         |       |  |
|---------|--------------------|--------------|----|------|----------------|------------|---------|-------|--|
| N46823  | <i>S. enterica</i> | Saintpaul    | CO | 2013 | Ground Turkey  | SRR2567004 | <= 0.25 | = 0.5 |  |
| N46830  | <i>S. enterica</i> | Saintpaul    | LA | 2013 | Ground Turkey  | SRR2567011 | <= 0.25 | = 0.5 |  |
| N46832  | <i>S. enterica</i> | Saintpaul    | LA | 2013 | Ground Turkey  | SRR2567013 | = 0.5   | = 0.5 |  |
| N47719  | <i>S. enterica</i> | Saintpaul    | NM | 2013 | Ground Turkey  | SRR2567051 | = 0.5   | = 0.5 |  |
| N50423  | <i>S. enterica</i> | Saintpaul    | MN | 2013 | Ground Turkey  | SRR2567105 | = 0.5   | = 0.5 |  |
| N51271  | <i>S. enterica</i> | Heidelberg   | MD | 2013 | Ground Turkey  | SRR2567164 | <= 0.25 | = 0.5 |  |
| N51291  | <i>S. enterica</i> | Saintpaul    | NM | 2013 | Ground Turkey  | SRR2567184 | = 0.5   | = 0.5 |  |
| N52030  | <i>S. enterica</i> | Saintpaul    | MN | 2014 | Ground Turkey  | SRR2407551 | <= 0.25 | = 0.5 |  |
| N52036  | <i>S. enterica</i> | Saintpaul    | NY | 2014 | Ground Turkey  | SRR2407557 | <= 0.25 | = 0.5 |  |
| N53023  | <i>S. enterica</i> | Heidelberg   | GA | 2014 | Ground Turkey  | SRR2407600 | <= 0.25 | = 0.5 |  |
| N53024  | <i>S. enterica</i> | Saintpaul    | GA | 2014 | Ground Turkey  | SRR2407601 | = 0.5   | = 0.5 |  |
| N53034  | <i>S. enterica</i> | Saintpaul    | MD | 2014 | Ground Turkey  | SRR2407610 | = 0.5   | = 0.5 |  |
| N53045  | <i>S. enterica</i> | Albany       | MN | 2014 | Ground Turkey  | SRR2407621 | = 0.5   | = 0.5 |  |
| N54702  | <i>S. enterica</i> | Albany       | CO | 2014 | Ground Turkey  | SRR2407719 | <= 0.25 | = 0.5 |  |
| N56232  | <i>S. enterica</i> | Heidelberg   | CT | 2015 | Ground Turkey  | SRR3295527 | <= 0.25 | = 0.5 |  |
| N58011  | <i>S. enterica</i> | Johannesburg | NY | 2015 | Chicken Breast | SRR3295596 | <= 0.25 | = 1   |  |
| N58631  | <i>S. enterica</i> | Heidelberg   | CT | 2015 | Ground Turkey  | SRR3932930 | = 0.5   | = 0.5 |  |
| N58640  | <i>S. enterica</i> | Albany       | GA | 2015 | Ground Turkey  | SRR3932939 | = 0.5   | = 1   |  |
| N62445  | <i>S. enterica</i> | Albany       | GA | 2015 | Ground Turkey  | SRR3932995 | <= 0.25 | = 0.5 |  |
| N62485  | <i>S. enterica</i> | Heidelberg   | NY | 2015 | Ground Turkey  | SRR3933030 | <= 0.25 | = 0.5 |  |
| N62491  | <i>S. enterica</i> | Heidelberg   | OR | 2015 | Ground Turkey  | SRR3933036 | <= 0.25 | = 0.5 |  |
| N62531  | <i>S. enterica</i> | Heidelberg   | CO | 2015 | Ground Turkey  | SRR3933071 | <= 0.25 | = 0.5 |  |
| N62952  | <i>S. enterica</i> | Saintpaul    | MD | 2015 | Ground Turkey  | SRR4280628 | = 0.5   | = 0.5 |  |
| N16S133 | <i>S. enterica</i> | Saintpaul    | MD | 2016 | Ground Turkey  | SRR6350898 | = 0.5   | = 1   |  |
| N16S270 | <i>S. enterica</i> | Saintpaul    | MD | 2016 | Ground Turkey  | SRR6351095 | = 1     | = 0.5 |  |
| N16S300 | <i>S. enterica</i> | Heidelberg   | MO | 2016 | Ground Turkey  | SRR6350817 | <= 0.25 | = 1   |  |
| N16S320 | <i>S. enterica</i> | Heidelberg   | NY | 2016 | Ground Turkey  | SRR6350800 | <= 0.25 | = 0.5 |  |
| N16S321 | <i>S. enterica</i> | Heidelberg   | NY | 2016 | Ground Turkey  | SRR6350795 | = 0.5   | = 0.5 |  |
| N16S324 | <i>S. enterica</i> | Heidelberg   | NY | 2016 | Ground Turkey  | SRR6351110 | = 1     | = 0.5 |  |
| N16S325 | <i>S. enterica</i> | Heidelberg   | NY | 2016 | Ground Beef    | SRR6351107 | <= 0.25 | = 0.5 |  |
| N16S366 | <i>S. enterica</i> | Heidelberg   | MD | 2016 | Ground Turkey  | SRR6351137 | <= 0.25 | = 0.5 |  |

|                       |                    |                |    |      |                |             |         |         |       |
|-----------------------|--------------------|----------------|----|------|----------------|-------------|---------|---------|-------|
| N16S371               | <i>S. enterica</i> | Heidelberg     | MN | 2016 | Ground Turkey  | SRR6351142  | = 0.5   | = 0.5   |       |
| N16S396               | <i>S. enterica</i> | Heidelberg     | NY | 2016 | Ground Turkey  | SRR6351092  | <= 0.25 | = 1     |       |
| N16S397               | <i>S. enterica</i> | Heidelberg     | NY | 2016 | Ground Turkey  | SRR6351091  | = 0.5   | = 0.5   |       |
| N16S410               | <i>S. enterica</i> | Heidelberg     | TN | 2016 | Ground Turkey  | SRR6350952  | <= 0.25 | = 0.5   |       |
| N17S166               | <i>S. enterica</i> | I 4,[5],12:i:- | MN | 2017 | Ground Turkey  | SRR7907656  | <= 0.25 | = 1     |       |
| N17S304               | <i>S. enterica</i> | Heidelberg     | PA | 2017 | Ground Turkey  | SRR7907864  | = 0.5   | = 0.5   |       |
| N17S1352              | <i>S. enterica</i> | Heidelberg     | MD | 2017 | Ground Turkey  | SRR7907589  | <= 0.25 | = 0.5   |       |
| N17S1465              | <i>S. enterica</i> | I 4,[5],12:i:- | SC | 2017 | Pork Chop      | SRR7907745  | <= 0.25 | = 0.5   |       |
| N18S1350              | <i>S. enterica</i> | Albany         | TX | 2018 | Ground Turkey  | SRR10857510 | <= 0.25 | = 0.5   |       |
| N18EC052              | <i>E. coli</i>     | N/A            | TN | 2018 | Chicken legs   | SRR9002373  | <= 0.25 | <= 0.25 | qseBC |
| N18EC0282             | <i>E. coli</i>     | N/A            | GA | 2018 | ground beef    | SRR9002289  | <= 0.25 | <= 0.25 | qseBC |
| N18EC0288             | <i>E. coli</i>     | N/A            | MD | 2018 | Chicken legs   | SRR9984932  | <= 0.25 | = 0.5   | qseBC |
| N18EC0432             | <i>E. coli</i>     | N/A            | CA | 2018 | Chicken wings  | SRR9984823  | <= 0.25 | <= 0.25 |       |
| N18EC1010             | <i>E. coli</i>     | N/A            | PA | 2018 | Ground Turkey  | SRR9984843  | <= 0.25 | = 0.5   |       |
| N19EC0438             | <i>E. coli</i>     | N/A            | OR | 2019 | Chicken Breast | SRR9324324  | = 0.5   | = 0.5   | qseBC |
| DH5alpha              | <i>E. coli</i>     |                |    |      |                |             | <= 0.25 | <= 0.25 |       |
| DH5alpha<br>(pN53023) | <i>E. coli</i>     |                |    |      |                |             | <= 0.25 | <= 0.25 |       |

**Table S2. Isolate-level long-read sequencing data**

| Strain ID | BioSample    | Serotype                 | Sequence     | PlasmidFinder  | length    | GenBank accession | Resistance genes                                                                                 |
|-----------|--------------|--------------------------|--------------|----------------|-----------|-------------------|--------------------------------------------------------------------------------------------------|
| CVM 28945 | SAMN02640938 | <i>S. Schwarzengrund</i> | chromosome   |                | 4,754,451 | CP048301          |                                                                                                  |
|           |              |                          | p28945-1     | IncFII         | 100,159   | CP048302          |                                                                                                  |
|           |              |                          | p28945-2     | IncHI2, IncH2A | 293,078   | CP048303          | <i>mcr-9.1, tet(C)</i>                                                                           |
| N14748    | SAMN03276122 | <i>S. Saintpaul</i>      | chromosome   |                | 4,986,471 | CP048926          | <i>mcr-9.1, tet(B)</i>                                                                           |
|           |              |                          | pN14748      | IncX1          | 53210     | CP048927          | <i>blaTEM-1, aph(3'')-Ib</i>                                                                     |
| N1566     | SAMN02782579 | <i>S. Schwarzengrund</i> | chromosome   |                | 4,799,306 | CP048297          |                                                                                                  |
|           |              |                          | pN1566-1     | IncI1          | 109,943   | CP048298          | <i>aadA1, aac(3)-VIa, qacEdelta1, sul1, blaTEM-1</i>                                             |
|           |              |                          | pN1566-2     | IncHI2, IncH2A | 293,131   | CP048299          | <i>tet(C), mcr-9.1</i>                                                                           |
|           |              |                          | pN1566-3     | IncFII         | 99,529    | CP048300          |                                                                                                  |
| N16S133   | SAMN08114010 | <i>S. Saintpaul</i>      | chromosome   |                | 4,915,695 | CP049986          | <i>tet(B), mcr-9.1</i>                                                                           |
|           |              |                          | pN16S133     | IncX1          | 43,420    | CP049987          | <i>blaTEM-1</i>                                                                                  |
| N16S321   | SAMN08114190 | <i>S. Heidelberg</i>     | chromosome   | IncHI2, IncH2A | 5,129,736 | CP049313          | <i>sul1, qacEdelta1, aac(3)-VIa, aadA1, mcr-9.1, fosA1</i>                                       |
| N18EC0432 | SAMN12359680 | <i>E. coli</i>           | chromosome   |                | 4,933,292 | CP048290          | <i>blaEC, sul2</i>                                                                               |
|           |              |                          | pN18EC0432-1 | IncHI2, IncH2A | 269,306   | CP048293          | <i>mcr-9.1, blaTEM-1, blaSHV-12, sul2, sul1, qacEdelta1, ere(A), arr, aac(3)-II, aac(6')-IIc</i> |
|           |              |                          | pN18EC0432-2 | IncFII, IncFIB | 137,411   | CP048296          | <i>tet(A), aac(3)-VIa, blaTEM,</i>                                                               |
|           |              |                          | pN18EC0432-3 | IncI1          | 99,802    | CP048295          | <i>blaCMY-2</i>                                                                                  |



|          |              |                 |              |                |           |          |                                                                         |
|----------|--------------|-----------------|--------------|----------------|-----------|----------|-------------------------------------------------------------------------|
|          |              |                 | pN18EC0432-4 | IncX1          | 47,739    | CP048291 |                                                                         |
|          |              |                 | pN18EC0432-5 | Col            | 2,461     | CP048292 |                                                                         |
| N18S2238 | SAMN12930429 | S. Albany       | chromosome   |                | 5,163,233 | CP049312 | <i>mcr-9.1, tet(B), aac(6')-Ib4, aadA1</i>                              |
| N40391   | SAMN05201855 | S. Saintpaul    | chromosome   |                | 4,845,998 | CP049983 | <i>tet(B), mcr-9.1</i>                                                  |
|          |              |                 | pN40391-1    | IncI1          | 114,945   | CP049984 | <i>blaTEM-1, aac(3)-IId, aadA1, tet(A)</i>                              |
|          |              |                 | pN40391-2    |                | 19,804    | CP049985 |                                                                         |
| N52030   | SAMN03988231 | S. Saintpaul    | chromosome   |                | 4,944,213 | CP049981 | <i>mcr-9, tet(B)</i>                                                    |
|          |              |                 | pN52030      |                | 43,418    | CP049982 | <i>blaTEM-1</i>                                                         |
| N53023   | SAMN03988280 | S. Heidelberg   | chromosome   |                | 4,821,913 | CP049310 |                                                                         |
|          |              |                 | pN53023      |                | 339,705   | CP049311 | <i>aac(6')-Ib4, aadA1, sul1, qacEdelta1, aac(3)-VIA, aadA1, mcr-9.1</i> |
| N58011   | SAMN04576680 | S. Johannesburg | chromosome   |                | 4,723,925 | CP049308 |                                                                         |
|          |              |                 | pN58011      | IncHI2, IncH2A | 310,945   | CP049309 | <i>mcr-9.1</i>                                                          |
| N58631   | SAMN05416424 | S. Heidelberg   | chromosome   |                |           | CP049306 |                                                                         |
|          |              |                 | pN58631      | IncHI2, IncH2A | 338,025   | CP049307 | <i>sul1, aac(3)-VIa, ant(3'')-Ia, aac(6')-Ib-cr, mcr-9</i>              |
